# Supplementary material for: Electrode informatics accelerated the optimization of key catalyst layer parameters in direct methanol fuel cells
Source: Royal Society of Chemistry journal article supplement (doi:10.1039/d4nr03026e), 2024-11-11
Supplement: d4nr03026e2.pdf [file d4nr03026e2.pdf]

*Supporting Information for*

**Electrode Informatics Accelerated Optimization for Catalyst  
Layer Key Parameters in Direct Methanol Fuel Cells**

***Lishou Ban<sup>a†</sup>, Danyang Huang<sup>a†</sup>, Yanyi Liu<sup>a†</sup>, Pengcheng Liu<sup>a</sup>, Xihui Bian<sup>b</sup>, Kaili Wang<sup>c</sup>, Yifan Liu<sup>\*d</sup>, Xijun Liu<sup>e\*</sup>, and Jia He<sup>a\*</sup>***

a. School of Chemistry and Chemical Engineering, Institute for New Energy Materials & Low-Carbon Technologies, School of Materials Science and Engineering, Tianjin University of Technology, Tianjin 300384, China

b. State Key Laboratory of Separation Membranes and Membrane Processes, School of Chemical Engineering and Technology, Tiangong University, Tianjin 300387, China

c. School of Chemistry, Chemical Engineering and Environmental Engineering, Weifang University, Weifang 261061, China

d. Suzhou Laboratory, Suzhou 215100, China.

e. State Key Laboratory of Featured Metal Materials and Life-cycle Safety for Composite Structures, Guangxi Key Laboratory of Processing for Non-ferrous Metals and Featured Materials, School of Resources, Environment and Materials, Guangxi University, Nanning, 530004 Guangxi, China

† These authors contributed equally to this work.

\* E-mail: sparkle06@163.com; xjliu@gxu.edu.cn; hejia1225@126.com

**Table S1.** Boundary conditions.

| Boundary areas                  | Boundary conditions  |                       |                                                                          |
|---------------------------------|----------------------|-----------------------|--------------------------------------------------------------------------|
|                                 | Charge transport     | Momentum transmission | Mass transport                                                           |
| Fuel inlet                      | -                    | U_in_anode            | C <sub>MeOH_in</sub> ,<br>1M H <sub>2</sub> O,<br>1e-4 M CO <sub>2</sub> |
| Fuel outlet                     | -                    | 1 atm                 | Convection                                                               |
| Air inlet                       | -                    | U_in_cathode          | xO <sub>2c_in</sub> , xH <sub>2</sub> O <sub>c_in</sub>                  |
| Air outlet                      | -                    | 1 atm                 | Convection                                                               |
| Anode GDL outer surface         | Insulation           | -                     | No slippage                                                              |
| Cathode GDL outer surface       | Insulation           | -                     | No slippage                                                              |
| Fuel and air flow channel walls | Insulation           | No slippage           | No slippage                                                              |
| Anode electrode outer surface   | Electrical grounding | -                     | -                                                                        |
| Cathode electrode outer surface | E <sub>cell</sub>    | -                     | -                                                                        |

**Table S2.** DMFC Model Parameters.

| <b>Parameter</b>                                              | <b>Value</b>                 |
|---------------------------------------------------------------|------------------------------|
| Runner length                                                 | 0.01 m                       |
| Runner height                                                 | 0.001 m                      |
| Runner width                                                  | 1.5748E-4 m                  |
| Runner spacing                                                | 1.81864E-4 m                 |
| GDL height                                                    | 3.8E-4 m                     |
| Porous electrode height                                       | 5E-5 m                       |
| Proton exchange membrane height                               | 1E-4 m                       |
| Porosity of GDL                                               | 0.7                          |
| Permeability of GDL                                           | 1E-12 m <sup>2</sup>         |
| Electronic conductivity of GDL                                | 222 S/m                      |
| Integral of the ionomer in CL                                 | 0.25                         |
| Porosity of CL                                                | 0.3                          |
| Permeability of CL                                            | 2E-14 m <sup>2</sup>         |
| Proton Conductivity of CL (nafion)                            | 12.3 S/m                     |
| Electronic conductivity of CL (solid)                         | 222 S/m                      |
| Conductivity of the membrane                                  | 9.825 S/m                    |
| Cathode oxygen mass fraction                                  | 0.228                        |
| Cathode water mass fraction                                   | 0.01                         |
| Molar mass of water                                           | 0.018 kg/mol                 |
| Molar mass of oxygen                                          | 0.032 kg/mol                 |
| Molar mass of nitrogen                                        | 0.028 kg/mol                 |
| Molar mass of cathode oxygen                                  | 0.20418                      |
| Molar mass of cathode water                                   | 0.015921                     |
| Molar mass of cathode nitrogen                                | 0.77989                      |
| Anode inlet velocity                                          | 0.13 m/s                     |
| Cathode inlet velocity                                        | 0.4 m/s                      |
| Anode viscosity coefficient                                   | 1.19E-5 Pa·s                 |
| Cathode viscosity coefficient                                 | 2.46E-5 Pa·s                 |
| MeOH-H <sub>2</sub> O Binary diffusion coefficient            | 1E-5 m <sup>2</sup> /s       |
| O <sub>2</sub> -N <sub>2</sub> Binary diffusion coefficient   | 2.8238E-5 m <sup>2</sup> /s  |
| O <sub>2</sub> -H <sub>2</sub> O Binary diffusion coefficient | 3.3188E-5 m <sup>2</sup> /s  |
| N <sub>2</sub> -H <sub>2</sub> O Binary diffusion coefficient | 3.0291E-5 m <sup>2</sup> /s  |
| Cell temperature                                              | 338.15 K                     |
| Reference pressure                                            | 1.01E5 Pa                    |
| Cell voltage                                                  | 1 V                          |
| Oxygen reference concentration                                | 36.5 mol/m <sup>3</sup>      |
| Methanol reference concentration                              | 100 mol/m <sup>3</sup>       |
| Molar gas constant                                            | 8.314 J/(mol·K)              |
| Specific surface area                                         | 1E5 1/m                      |
| Anode equilibrium potential                                   | 0.046 V                      |
| Cathode equilibrium potential                                 | 1.05 V                       |
| Anode reference current density                               | 43.82 A/m <sup>2</sup>       |
| Cathode reference current density                             | 0.0422 A/m <sup>2</sup>      |
| Inlet methanol concentration                                  | 1000 mol/m <sup>3</sup>      |
| Diffusion coefficient of methanol in the membrane             | 1.1989E-12 m <sup>2</sup> /s |

Table S3. DMFC Database

| No. | T   | thickness | thickness | poro | CL  | poro | CL   | enafion | CL   | enafion | CL  | elec     | CL       | elec | CL     | in     | U | in  | ca   | kappa | CL   | kappa     | CL | MeOH | in | Av | an | Av | ca | p_ref | sigma | CL | sigma | CL | MeOH | ref | 2 | FO |
|-----|-----|-----------|-----------|------|-----|------|------|---------|------|---------|-----|----------|----------|------|--------|--------|---|-----|------|-------|------|-----------|----|------|----|----|----|----|----|-------|-------|----|-------|----|------|-----|---|----|
| 0   | 45  | 0.0005    | 0.0005    | 0.3  | 0.3 | 0.25 | 0.25 | 0.45    | 0.45 | 0.13    | 0.4 | 2.00E-14 | 2.00E-14 | 1    | 100000 | 100000 | 1 | 222 | 12.3 | 100   | 36.5 | 0.0572566 |    |      |    |    |    |    |    |       |       |    |       |    |      |     |   |    |
| 1   | 55  | 0.0005    | 0.0005    | 0.3  | 0.3 | 0.25 | 0.25 | 0.45    | 0.45 | 0.13    | 0.4 | 2.00E-14 | 2.00E-14 | 1    | 100000 | 100000 | 1 | 222 | 12.3 | 100   | 36.5 | 0.0613302 |    |      |    |    |    |    |    |       |       |    |       |    |      |     |   |    |
| 2   | 65  | 0.0005    | 0.0005    | 0.3  | 0.3 | 0.25 | 0.25 | 0.45    | 0.45 | 0.13    | 0.4 | 2.00E-14 | 2.00E-14 | 1    | 100000 | 100000 | 1 | 222 | 12.3 | 100   | 36.5 | 0.0636062 |    |      |    |    |    |    |    |       |       |    |       |    |      |     |   |    |
| 3   | 75  | 0.0005    | 0.0005    | 0.3  | 0.3 | 0.25 | 0.25 | 0.45    | 0.45 | 0.13    | 0.4 | 2.00E-14 | 2.00E-14 | 1    | 100000 | 100000 | 1 | 222 | 12.3 | 100   | 36.5 | 0.0623353 |    |      |    |    |    |    |    |       |       |    |       |    |      |     |   |    |
| 4   | 85  | 0.0005    | 0.0005    | 0.3  | 0.3 | 0.25 | 0.25 | 0.45    | 0.45 | 0.13    | 0.4 | 2.00E-14 | 2.00E-14 | 1    | 100000 | 100000 | 1 | 222 | 12.3 | 100   | 36.5 | 0.0653119 |    |      |    |    |    |    |    |       |       |    |       |    |      |     |   |    |
| 5   | 95  | 0.0005    | 0.0005    | 0.3  | 0.3 | 0.25 | 0.25 | 0.45    | 0.45 | 0.13    | 0.4 | 2.00E-14 | 2.00E-14 | 1    | 100000 | 100000 | 1 | 222 | 12.3 | 100   | 36.5 | 0.0572562 |    |      |    |    |    |    |    |       |       |    |       |    |      |     |   |    |
| 6   | 105 | 0.0005    | 0.0005    | 0.3  | 0.3 | 0.25 | 0.25 | 0.45    | 0.45 | 0.13    | 0.4 | 2.00E-14 | 2.00E-14 | 1    | 100000 | 100000 | 1 | 222 | 12.3 | 100   | 36.5 | 0.0546369 |    |      |    |    |    |    |    |       |       |    |       |    |      |     |   |    |
| 7   | 115 | 0.0005    | 0.0005    | 0.3  | 0.3 | 0.25 | 0.25 | 0.45    | 0.45 | 0.13    | 0.4 | 2.00E-14 | 2.00E-14 | 1    | 100000 | 100000 | 1 | 222 | 12.3 | 100   | 36.5 | 0.0627878 |    |      |    |    |    |    |    |       |       |    |       |    |      |     |   |    |
| 8   | 125 | 0.0005    | 0.0005    | 0.3  | 0.3 | 0.25 | 0.25 | 0.45    | 0.45 | 0.13    | 0.4 | 2.00E-14 | 2.00E-14 | 1    | 100000 | 100000 | 1 | 222 | 12.3 | 100   | 36.5 | 0.0645318 |    |      |    |    |    |    |    |       |       |    |       |    |      |     |   |    |
| 9   | 135 | 0.0005    | 0.0005    | 0.3  | 0.3 | 0.25 | 0.25 | 0.45    | 0.45 | 0.13    | 0.4 | 2.00E-14 | 2.00E-14 | 1    | 100000 | 100000 | 1 | 222 | 12.3 | 100   | 36.5 | 0.0238954 |    |      |    |    |    |    |    |       |       |    |       |    |      |     |   |    |
| 10  | 145 | 0.00015   | 0.0005    | 0.3  | 0.3 | 0.25 | 0.25 | 0.45    | 0.45 | 0.13    | 0.4 | 2.00E-14 | 2.00E-14 | 1    | 100000 | 100000 | 1 | 222 | 12.3 | 100   | 36.5 | 0.0419281 |    |      |    |    |    |    |    |       |       |    |       |    |      |     |   |    |
| 11  | 155 | 0.00025   | 0.0005    | 0.3  | 0.3 | 0.25 | 0.25 | 0.45    | 0.45 | 0.13    | 0.4 | 2.00E-14 | 2.00E-14 | 1    | 100000 | 100000 | 1 | 222 | 12.3 | 100   | 36.5 | 0.0320388 |    |      |    |    |    |    |    |       |       |    |       |    |      |     |   |    |
| 12  | 165 | 0.00035   | 0.0005    | 0.3  | 0.3 | 0.25 | 0.25 | 0.45    | 0.45 | 0.13    | 0.4 | 2.00E-14 | 2.00E-14 | 1    | 100000 | 100000 | 1 | 222 | 12.3 | 100   | 36.5 | 0.0653119 |    |      |    |    |    |    |    |       |       |    |       |    |      |     |   |    |
| 13  | 175 | 0.00045   | 0.0005    | 0.3  | 0.3 | 0.25 | 0.25 | 0.45    | 0.45 | 0.13    | 0.4 | 2.00E-14 | 2.00E-14 | 1    | 100000 | 100000 | 1 | 222 | 12.3 | 100   | 36.5 | 0.0618576 |    |      |    |    |    |    |    |       |       |    |       |    |      |     |   |    |
| 14  | 185 | 0.00055   | 0.0005    | 0.3  | 0.3 | 0.25 | 0.25 | 0.45    | 0.45 | 0.13    | 0.4 | 2.00E-14 | 2.00E-14 | 1    | 100000 | 100000 | 1 | 222 | 12.3 | 100   | 36.5 | 0.0639764 |    |      |    |    |    |    |    |       |       |    |       |    |      |     |   |    |
| 15  | 195 | 0.00065   | 0.0005    | 0.3  | 0.3 | 0.25 | 0.25 | 0.45    | 0.45 | 0.13    | 0.4 | 2.00E-14 | 2.00E-14 | 1    | 100000 | 100000 | 1 | 222 | 12.3 | 100   | 36.5 | 0.0651629 |    |      |    |    |    |    |    |       |       |    |       |    |      |     |   |    |
| 16  | 205 | 0.00075   | 0.0005    | 0.3  | 0.3 | 0.25 | 0.25 | 0.45    | 0.45 | 0.13    | 0.4 | 2.00E-14 | 2.00E-14 | 1    | 100000 | 100000 | 1 | 222 | 12.3 | 100   | 36.5 | 0.0648332 |    |      |    |    |    |    |    |       |       |    |       |    |      |     |   |    |
| 17  | 215 | 0.00085   | 0.0005    | 0.3  | 0.3 | 0.25 | 0.25 | 0.45    | 0.45 | 0.13    | 0.4 | 2.00E-14 | 2.00E-14 | 1    | 100000 | 100000 | 1 | 222 | 12.3 | 100   | 36.5 | 0.0642348 |    |      |    |    |    |    |    |       |       |    |       |    |      |     |   |    |
| 18  | 225 | 0.00095   | 0.0005    | 0.3  | 0.3 | 0.25 | 0.25 | 0.45    | 0.45 | 0.13    | 0.4 | 2.00E-14 | 2.00E-14 | 1    | 100000 | 100000 | 1 | 222 | 12.3 | 100   | 36.5 | 0.0649383 |    |      |    |    |    |    |    |       |       |    |       |    |      |     |   |    |
| 19  | 235 | 0.00105   | 0.0005    | 0.3  | 0.3 | 0.25 | 0.25 | 0.45    | 0.45 | 0.13    | 0.4 | 2.00E-14 | 2.00E-14 | 1    | 100000 | 100000 | 1 | 222 | 12.3 | 100   | 36.5 | 0.0655632 |    |      |    |    |    |    |    |       |       |    |       |    |      |     |   |    |
| 20  | 245 | 0.00115   | 0.0005    | 0.3  | 0.3 | 0.25 | 0.25 | 0.45    | 0.45 | 0.13    | 0.4 | 2.00E-14 | 2.00E-14 | 1    | 100000 | 100000 | 1 | 222 | 12.3 | 100   | 36.5 | 0.0649434 |    |      |    |    |    |    |    |       |       |    |       |    |      |     |   |    |
| 21  | 255 | 0.00125   | 0.0005    | 0.3  | 0.3 | 0.25 | 0.25 | 0.45    | 0.45 | 0.13    | 0.4 | 2.00E-14 | 2.00E-14 | 1    | 100000 | 100000 | 1 | 222 | 12.3 | 100   | 36.5 | 0.0645822 |    |      |    |    |    |    |    |       |       |    |       |    |      |     |   |    |
| 22  | 265 | 0.00135   | 0.0005    | 0.3  | 0.3 | 0.25 | 0.25 | 0.45    | 0.45 | 0.13    | 0.4 | 2.00E-14 | 2.00E-14 | 1    | 100000 | 100000 | 1 | 222 | 12.3 | 100   | 36.5 | 0.0653668 |    |      |    |    |    |    |    |       |       |    |       |    |      |     |   |    |
| 23  | 275 | 0.00145   | 0.0005    | 0.3  | 0.3 | 0.25 | 0.25 | 0.45    | 0.45 | 0.13    | 0.4 | 2.00E-14 | 2.00E-14 | 1    | 100000 | 100000 | 1 | 222 | 12.3 | 100   | 36.5 | 0.0649156 |    |      |    |    |    |    |    |       |       |    |       |    |      |     |   |    |
| 24  | 285 | 0.00155   | 0.0005    | 0.3  | 0.3 | 0.25 | 0.25 | 0.45    | 0.45 | 0.13    | 0.4 | 2.00E-14 | 2.00E-14 | 1    | 100000 | 100000 | 1 | 222 | 12.3 | 100   | 36.5 | 0.0646544 |    |      |    |    |    |    |    |       |       |    |       |    |      |     |   |    |
| 25  | 295 | 0.00165   | 0.0005    | 0.3  | 0.3 | 0.25 | 0.25 | 0.45    | 0.45 | 0.13    | 0.4 | 2.00E-14 | 2.00E-14 | 1    | 100000 | 100000 | 1 | 222 | 12.3 | 100   | 36.5 | 0.0656525 |    |      |    |    |    |    |    |       |       |    |       |    |      |     |   |    |
| 26  | 305 | 0.00175   | 0.0005    | 0.3  | 0.3 | 0.25 | 0.25 | 0.45    | 0.45 | 0.13    | 0.4 | 2.00E-14 | 2.00E-14 | 1    | 100000 | 100000 | 1 | 222 | 12.3 | 100   | 36.5 | 0.0668902 |    |      |    |    |    |    |    |       |       |    |       |    |      |     |   |    |
| 27  | 315 | 0.00185   | 0.0005    | 0.3  | 0.3 | 0.25 | 0.25 | 0.45    | 0.45 | 0.13    | 0.4 | 2.00E-14 | 2.00E-14 | 1    | 100000 | 100000 | 1 | 222 | 12.3 | 100   | 36.5 | 0.0646278 |    |      |    |    |    |    |    |       |       |    |       |    |      |     |   |    |
| 28  | 325 | 0.00195   | 0.0005    | 0.3  | 0.3 | 0.25 | 0.25 | 0.45    | 0.45 | 0.13    | 0.4 | 2.00E-14 | 2.00E-14 | 1    | 100000 | 100000 | 1 | 222 | 12.3 | 100   | 36.5 | 0.0628583 |    |      |    |    |    |    |    |       |       |    |       |    |      |     |   |    |
| 29  | 335 | 0.00205   | 0.0005    | 0.3  | 0.3 | 0.25 | 0.25 | 0.45    | 0.45 | 0.13    | 0.4 | 2.00E-14 | 2.00E-14 | 1    | 100000 | 100000 | 1 | 222 | 12.3 | 100   | 36.5 | 0.0613108 |    |      |    |    |    |    |    |       |       |    |       |    |      |     |   |    |
| 30  | 345 | 0.00215   | 0.0005    | 0.3  | 0.3 | 0.25 | 0.25 | 0.45    | 0.45 | 0.13    | 0.4 | 2.00E-14 | 2.00E-14 | 1    | 100000 | 100000 | 1 | 222 | 12.3 | 100   | 36.5 | 0.0632233 |    |      |    |    |    |    |    |       |       |    |       |    |      |     |   |    |
| 31  | 355 | 0.00225   | 0.0005    | 0.3  | 0.3 | 0.25 | 0.25 | 0.45    | 0.45 | 0.13    | 0.4 | 2.00E-14 | 2.00E-14 | 1    | 100000 | 100000 | 1 | 222 | 12.3 | 100   | 36.5 | 0.0645474 |    |      |    |    |    |    |    |       |       |    |       |    |      |     |   |    |
| 32  | 365 | 0.00235   | 0.0005    | 0.3  | 0.3 | 0.25 | 0.25 | 0.45    | 0.45 | 0.13    | 0.4 | 2.00E-14 | 2.00E-14 | 1    | 100000 | 100000 | 1 | 222 | 12.3 | 100   | 36.5 | 0.0654471 |    |      |    |    |    |    |    |       |       |    |       |    |      |     |   |    |
| 33  | 375 | 0.00245   | 0.0005    | 0.3  | 0.3 | 0.25 | 0.25 | 0.45    | 0.45 | 0.13    | 0.4 | 2.00E-14 | 2.00E-14 | 1    | 100000 | 100000 | 1 | 222 | 12.3 | 100   | 36.5 | 0.060741  |    |      |    |    |    |    |    |       |       |    |       |    |      |     |   |    |
| 34  | 385 | 0.00255   | 0.0005    | 0.3  | 0.3 | 0.25 | 0.25 | 0.45    | 0.45 | 0.13    | 0.4 | 2.00E-14 | 2.00E-14 | 1    | 100000 | 100000 | 1 | 222 | 12.3 | 100   | 36.5 | 0.0649781 |    |      |    |    |    |    |    |       |       |    |       |    |      |     |   |    |
| 35  | 395 | 0.00265   | 0.0005    | 0.3  | 0.3 | 0.25 | 0.25 | 0.45    | 0.45 | 0.13    | 0.4 | 2.00E-14 | 2.00E-14 | 1    | 100000 | 100000 | 1 | 222 | 12.3 | 100   | 36.5 | 0.0678578 |    |      |    |    |    |    |    |       |       |    |       |    |      |     |   |    |
| 36  | 405 | 0.00275   | 0.0005    | 0.3  | 0.3 | 0.25 | 0.25 | 0.45    | 0.45 | 0.13    | 0.4 | 2.00E-14 | 2.00E-14 | 1    | 100000 | 100000 | 1 | 222 | 12.3 | 100   | 36.5 | 0.0687717 |    |      |    |    |    |    |    |       |       |    |       |    |      |     |   |    |
| 37  | 415 | 0.00285   | 0.0005    | 0.3  | 0.3 | 0.1  | 0.25 | 0.6     | 0.45 | 0.13    | 0.4 | 2.00E-14 | 2.00E-14 | 1    | 100000 | 100000 | 1 | 222 | 12.3 | 100   | 36.5 | 0.0508117 |    |      |    |    |    |    |    |       |       |    |       |    |      |     |   |    |
| 38  | 425 | 0.00295   | 0.0005    | 0.3  | 0.3 | 0.2  | 0.25 | 0.5     | 0.45 | 0.13    | 0.4 | 2.00E-14 | 2.00E-14 | 1    | 100000 | 100000 | 1 | 222 | 12.3 | 100   | 36.5 | 0.060737  |    |      |    |    |    |    |    |       |       |    |       |    |      |     |   |    |
| 39  | 435 | 0.00305   | 0.0005    | 0.3  | 0.3 | 0.25 | 0.25 | 0.45    | 0.45 | 0.13    | 0.4 | 2.00E-14 | 2.00E-14 | 1    | 100000 | 100000 | 1 | 222 | 12.3 | 100   | 36.5 | 0.0645844 |    |      |    |    |    |    |    |       |       |    |       |    |      |     |   |    |
| 40  | 445 | 0.00315   | 0.0005    | 0.3  | 0.3 | 0.4  | 0.25 | 0.3     | 0.45 | 0.13    | 0.4 | 2.00E-14 | 2.00E-14 | 1    | 100000 | 100000 | 1 | 222 | 12.3 | 100   | 36.5 | 0.0666825 |    |      |    |    |    |    |    |       |       |    |       |    |      |     |   |    |
| 41  | 455 | 0.00325   | 0.0005    | 0.3  | 0.3 | 0.5  | 0.25 | 0.2     | 0.45 | 0.13    | 0.4 | 2.00E-14 | 2.00E-14 | 1    | 100000 | 100000 | 1 | 222 | 12.3 | 100   | 36.5 | 0.0678861 |    |      |    |    |    |    |    |       |       |    |       |    |      |     |   |    |
| 42  | 465 | 0.00335   | 0.0005    | 0.3  | 0.3 | 0.6  | 0.25 | 0.1     | 0.45 | 0.13    | 0.4 | 2.00E-14 | 2.00E-14 | 1    | 100000 | 100000 | 1 | 222 | 12.3 | 100   | 36.5 | 0.0685344 |    |      |    |    |    |    |    |       |       |    |       |    |      |     |   |    |
| 43  | 475 | 0.00345   | 0.0005    | 0.3  | 0.3 | 0.75 | 0.25 | 0.1     | 0.45 | 0.13    | 0.4 | 2.00E-14 | 2.00E-14 | 1    | 100000 | 100000 | 1 | 222 | 12.3 | 100   | 36.5 | 0.0672329 |    |      |    |    |    |    |    |       |       |    |       |    |      |     |   |    |
| 44  | 485 | 0.00355   | 0.0005    | 0.2  | 0.3 | 0.35 | 0.25 | 0.45    | 0.45 | 0.13    | 0.4 | 2.00E-14 | 2.00E-14 | 1    | 100000 | 100000 | 1 | 222 | 12.3 | 100   | 36.5 | 0.0685976 |    |      |    |    |    |    |    |       |       |    |       |    |      |     |   |    |
| 45  | 495 | 0.00365   | 0.0005    | 0.3  | 0.3 | 0.25 | 0.25 | 0.45    | 0.45 | 0.13    | 0.4 | 2.00E-14 | 2.00E-14 | 1    | 100000 | 100000 | 1 | 222 | 12.3 | 100   | 36.5 | 0.0630673 |    |      |    |    |    |    |    |       |       |    |       |    |      |     |   |    |
| 46  | 505 | 0.00375   | 0.0005    | 0.4  | 0.3 | 0.15 | 0.25 | 0.45    | 0.45 | 0.13    | 0.4 | 2.00E-14 | 2.00E-14 | 1    | 100000 | 100000 | 1 | 222 | 12.3 | 100   | 36.5 | 0.0656909 |    |      |    |    |    |    |    |       |       |    |       |    |      |     |   |    |
| 47  | 515 | 0.00385   | 0.0005    | 0.3  | 0.3 | 0.25 | 0.25 | 0.45    | 0.45 | 0.13    | 0.4 | 2.00E-14 | 2.00E-14 | 1    | 100000 | 100000 | 1 | 222 | 12.3 | 100   | 36.5 | 0.0631291 |    |      |    |    |    |    |    |       |       |    |       |    |      |     |   |    |
| 48  | 525 | 0.00395   | 0.0005    | 0.1  | 0.3 | 0.25 | 0.25 | 0.65    | 0.45 | 0.13    | 0.4 | 2.00E-14 | 2.00E-14 | 1    | 100000 | 100000 | 1 | 222 | 12.3 | 100   | 36.5 | 0.0630717 |    |      |    |    |    |    |    |       |       |    |       |    |      |     |   |    |
| 49  | 535 | 0.00405   | 0.0005    | 0.2  | 0.3 | 0.25 | 0.25 | 0.55    | 0.45 | 0.13    | 0.4 | 2.00E-14 | 2.00E-14 | 1    | 100000 | 100000 | 1 | 222 | 12.3 | 100   | 36.5 | 0.0631291 |    |      |    |    |    |    |    |       |       |    |       |    |      |     |   |    |
| 50  | 545 | 0.00415   | 0.0005    | 0.3  | 0.3 | 0.25 | 0.25 | 0.45    | 0.45 | 0.13    | 0.4 | 2.00E-14 | 2.00E-14 | 1    | 100000 | 100000 | 1 | 222 | 12.3 | 100   | 36.5 | 0.0630673 |    |      |    |    |    |    |    |       |       |    |       |    |      |     |   |    |
| 51  | 555 | 0.00425   | 0.0005    | 0.3  | 0.3 | 0.25 | 0.25 | 0.45    | 0.45 | 0.13    | 0.4 | 2.00E-14 | 2.00E-14 | 1    | 100000 | 100000 | 1 | 222 | 12.3 | 100   | 36.5 | 0.0630673 |    |      |    |    |    |    |    |       |       |    |       |    |      |     |   |    |
| 52  | 565 | 0.00435   | 0.0005    | 0.5  | 0.3 | 0.25 | 0.25 | 0.25    | 0.45 | 0.13    | 0.4 | 2.00E-14 | 2.00E-14 | 1    | 100000 | 100000 | 1 | 222 | 12.3 | 100   | 36.5 | 0.0631303 |    |      |    |    |    |    |    |       |       |    |       |    |      |     |   |    |
| 53  | 575 | 0.00445   | 0.0005    | 0.6  | 0.3 | 0.25 | 0.25 | 0.15    | 0.45 | 0.13    | 0.4 | 2.00E-14 | 2.00E-14 | 1    | 100000 | 100000 | 1 | 222 | 12.3 | 100   | 36.5 | 0.063068  |    |      |    |    |    |    |    |       |       |    |       |    |      |     |   |    |
| 54  | 585 | 0.00455   | 0.0005    | 0.7  | 0.3 | 0.25 | 0.25 | 0.05    | 0.45 | 0.13    | 0.4 | 2.00E-14 | 2.00E-14 | 1    | 100000 | 100000 | 1 |     |      |       |      |           |    |      |    |    |    |    |    |       |       |    |       |    |      |     |   |    |



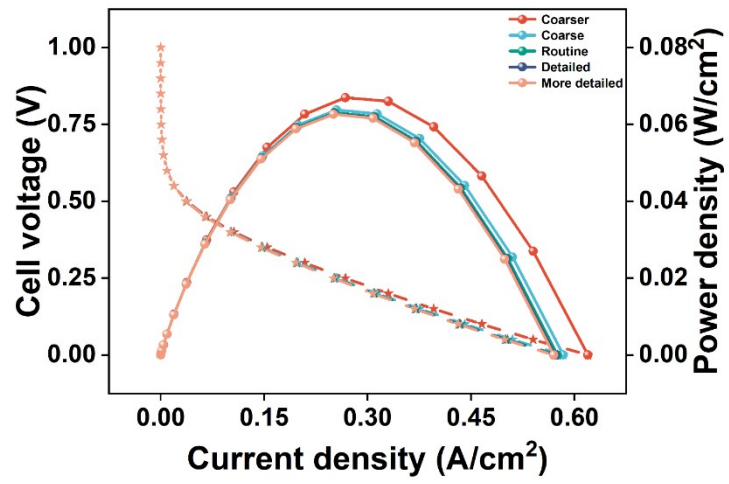

Figure S1. DMFC Grid Consistency Verification.

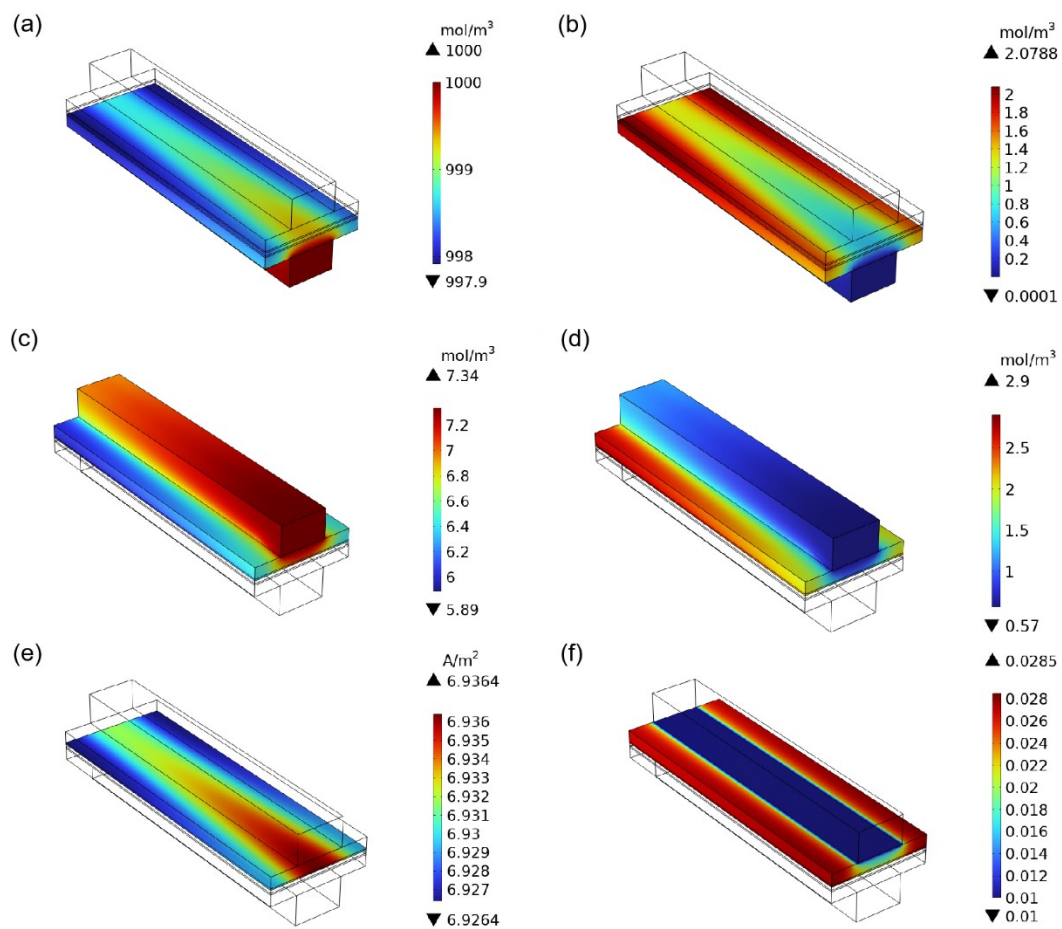

**Figure S2.** Concentration distribution of reactants and products (0.25 V): (a) Molar concentration of methanol at the anode, (b) Molar concentration of  $\text{CO}_2$  at the anode, (c) Molar concentration of oxygen at the cathode, (d) Molar concentration of water at the cathode. Cross current density generated by methanol infiltration at the anode (0.25 V). Liquid Saturation at Cathode GDL and CL (0.25 V).

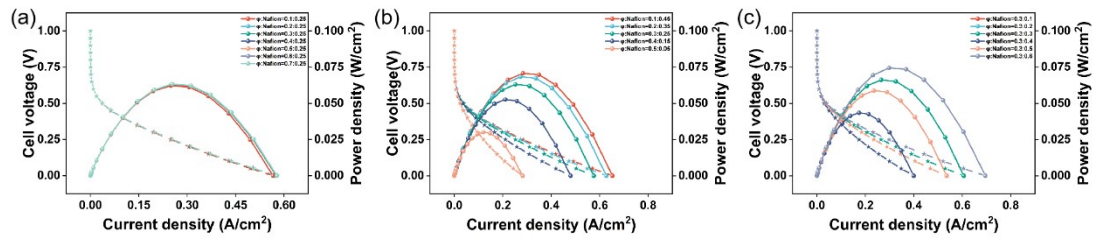

**Figure S3.** Polarization curve obtained by changing the ratio between porosity and nafion in the catalyst layer; (a) Porosity changes, nafion remains unchanged; (b) Porosity changes, nafion changes; (c) Porosity remains unchanged and nafion changes.



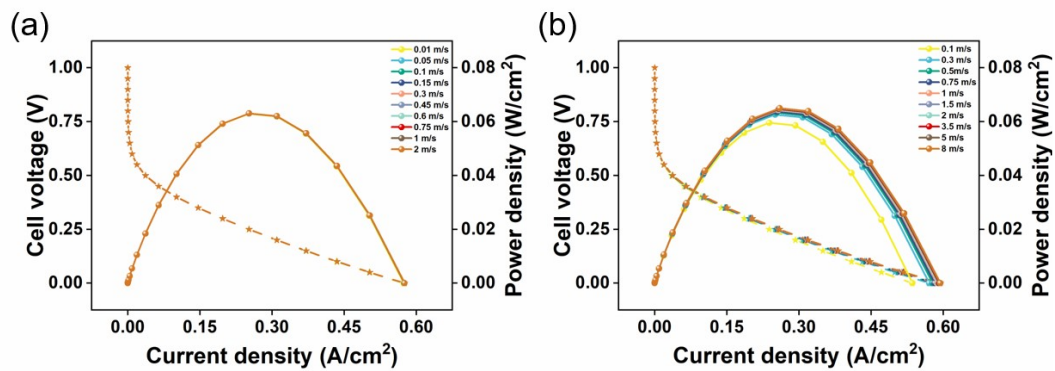

**Figure S4.** Polarization curve obtained by changing the inlet velocity of methanol at the anode and oxygen at the cathode.

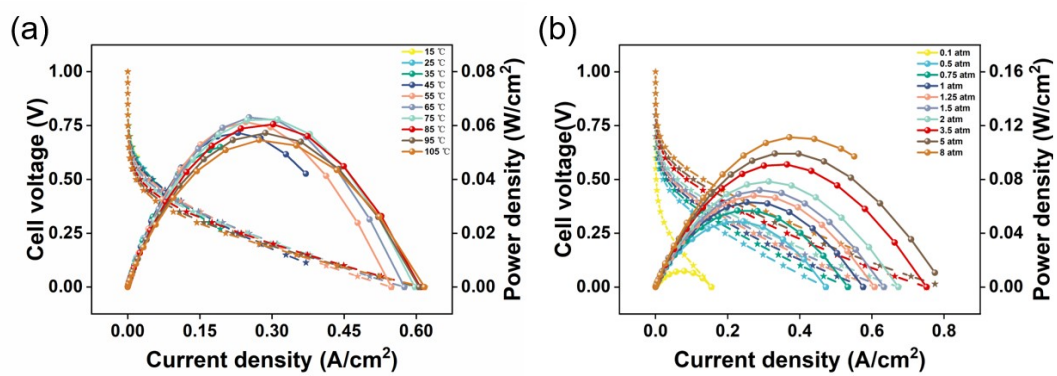

**Figure S5.** Polarization curve obtained by changing temperature and pressure.

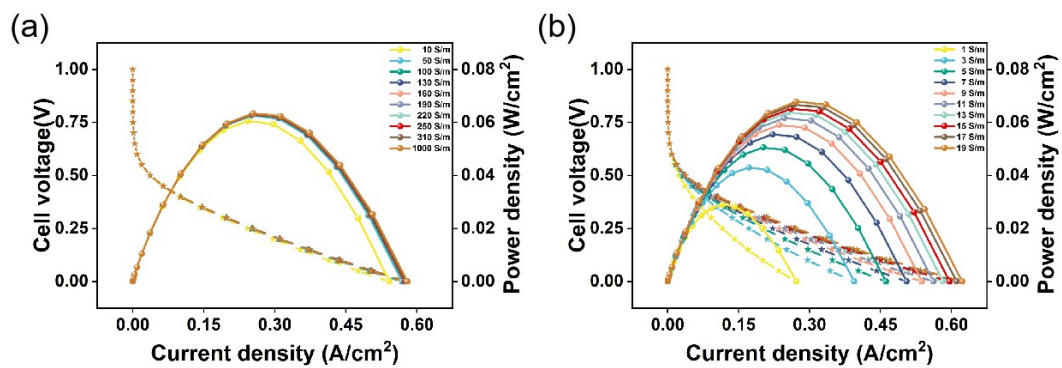

**Figure S6.** Polarization curves obtained by changing (a) electron conductivity and (b) proton conductivity.

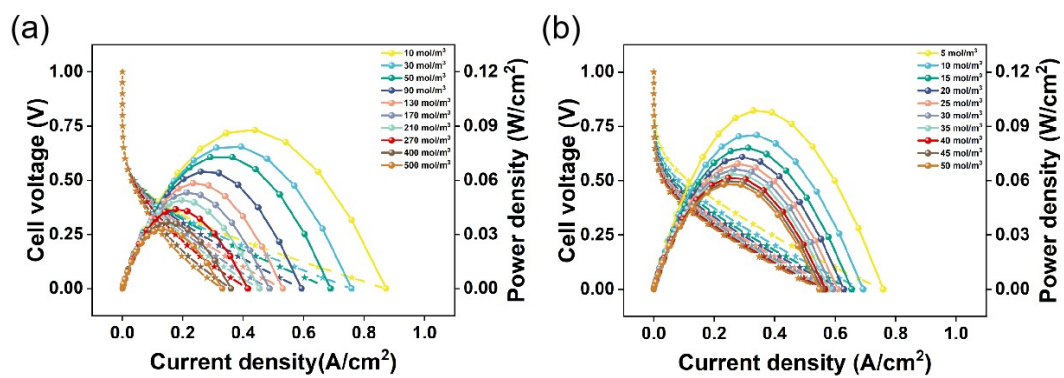

Figure S7. Polarization curve obtained by changing (a) anode methanol concentration and (b) cathode oxygen concentration.

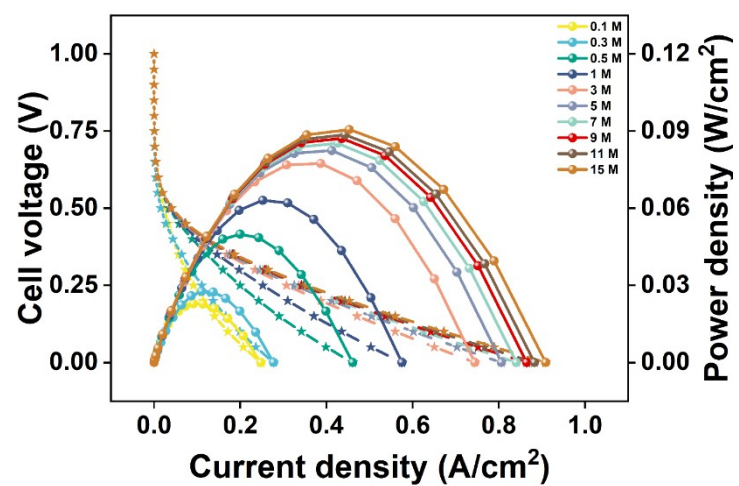

Figure S8. Polarization curve obtained by changing anode methanol inlet concentration.

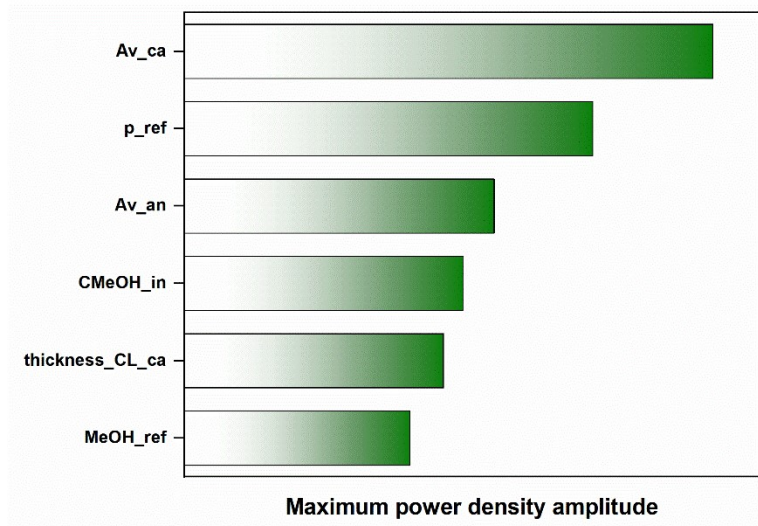

**Figure S9.** The influence of different parameters on the maximum power density amplitude of fuel cells from simulation model (top 6).

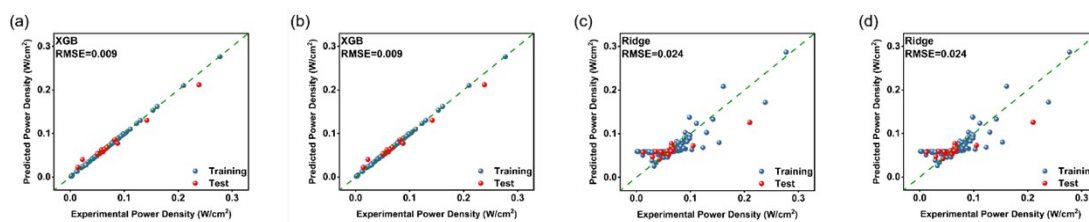

**Figure S10.** The other four algorithms' data training test (90% - 10%) error plots. (a)KRR; (b)LASSO; (c)RIDGE; (d)SVR. Training data (blue), test data (red).

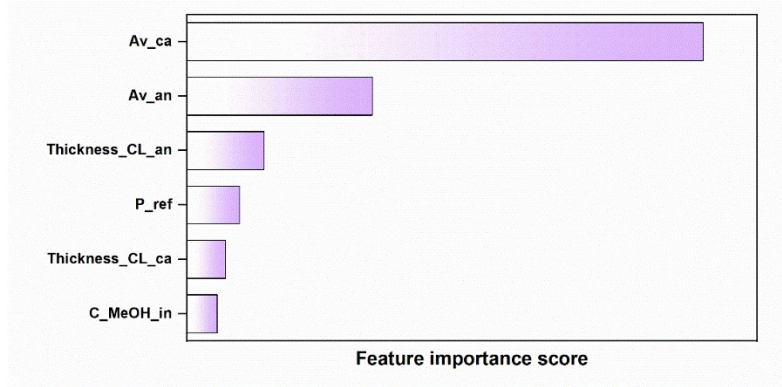

**Figure S11.** Average feature importance prediction plots using the ratio of maximum power density to different pressures based on the best ETR models in ten-fold cross-validation (top 6).
